# Supplementary material for: Dose of Incorporated Immunodominant Antigen in Recombinant BCG Impacts Modestly on Th1 Immune Response and Protective Efficiency againstMycobacterium tuberculosisin Mice
Source: Hindawi journal article supplement (doi:10.1155/2014/196124), 2014-01-01

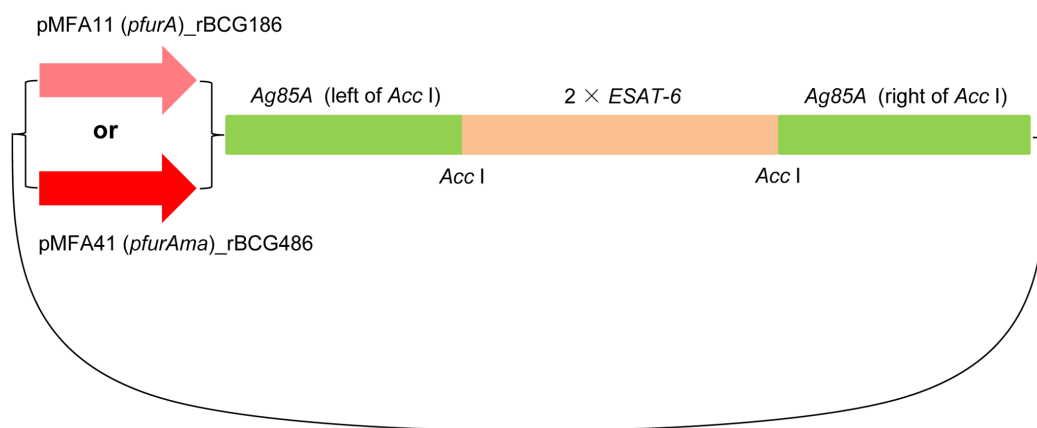

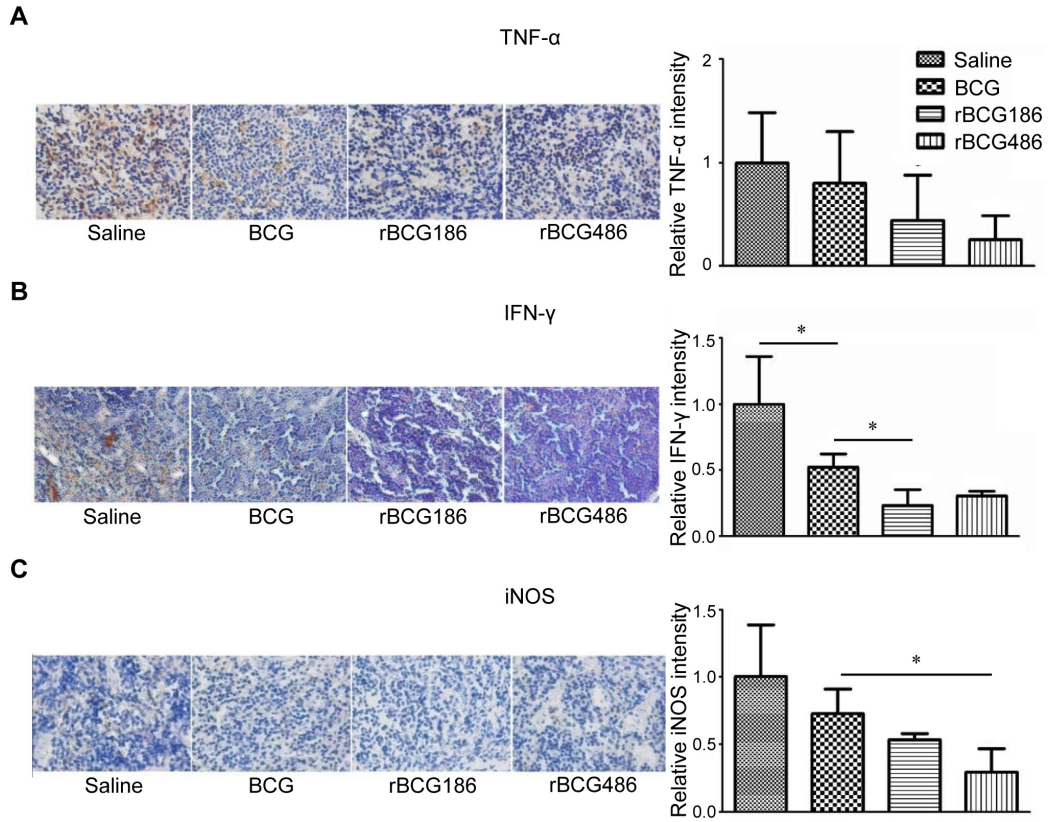

Supplement: f1 [file 196124.f1.pdf]
